# Supplementary material for: In situ crystallization and growth of TiO2 nanospheres between MXene layers for improved adsorption and visible light photocatalysis
Source: Royal Society of Chemistry journal article supplement (doi:10.1039/d1cy00239b), 2021-01-01
Supplement: d1cy00239b1.pdf [file d1cy00239b1.pdf]

## SUPPORTING INFORMATION

### In-situ Crystallization and Growth of TiO<sub>2</sub> Nanospheres between MXene Layers for Improved Adsorption and Visible Photocatalysis

Li Zhang<sup>\*a,§</sup>, Pingping Ma<sup>a,§</sup>, Li Dai<sup>a</sup>, Shijie Li<sup>b</sup>, Wei Yu<sup>a</sup>, and Jie Guan<sup>\*a</sup>

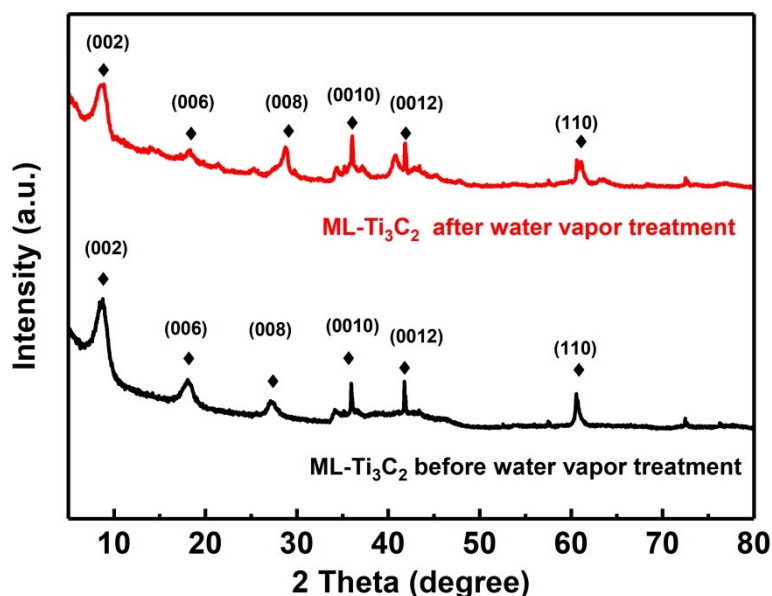

**Fig. S1.** XRD patterns of ML-Ti<sub>3</sub>C<sub>2</sub> MXene before (black line) and after (red line) water vapor treatment.

<sup>a</sup> Research Center of Resource Recycling Science and Engineering, School of Environmental and Materials Engineering, Shanghai Polytechnic University, Shanghai 201209, People's Republic of China

<sup>b</sup> Innovation & Application Institute, Zhejiang Ocean University, Zhoushan 316022, People's Republic of China

§ These authors contribute equally to this work. \* Author to whom correspondence should be addressed. E-mail: zhangli@sspu.edu.cn; guanjie@sspu.edu.cn.
